# Supplementary material for: CuS-131I-PEG Nanotheranostics-Induced “Multiple Mild-Hyperthermia” Strategy to Overcome Radio-Resistance in Lung Cancer Brachytherapy
Source: MDPI journal article supplement (doi:10.3390/pharmaceutics14122669), 2022-11-30
Supplement: s1 [file s1]

# CuS-<sup>131</sup>I-PEG nanotheranostics-induced “multiple mild-hyperthermia” strategy to overcome radio-resistance in lung cancer brachytherapy

Yanna Cui <sup>1,†</sup>, Hui Yan <sup>1,†</sup>, Haoze Wang <sup>1,2</sup>, Yongming Zhang <sup>1</sup>, Meng Li <sup>1,2</sup>, Kai Cui <sup>1</sup>, Zeyu Xiao <sup>1,\*</sup>, Liu Liu <sup>1,\*</sup>, Wenhui Xie <sup>1,\*</sup>

1 Department of Nuclear Medicine, Shanghai Chest Hospital & Department of Pharmacology and Chemical Biology, Translational Medicine Collaborative Innovation Center, Shanghai Jiao Tong University School of Medicine, Shanghai 200025, China.

2 College of Chemistry and Materials Science, Shanghai Normal University, Shanghai 200233, China.

\* Correspondence: zxiao@sjtu.edu.cn (Z. X.); chestnuclear@126.com (L. L.); xknuclear@163.com (X. W.)

† These authors contributed equally to this work.

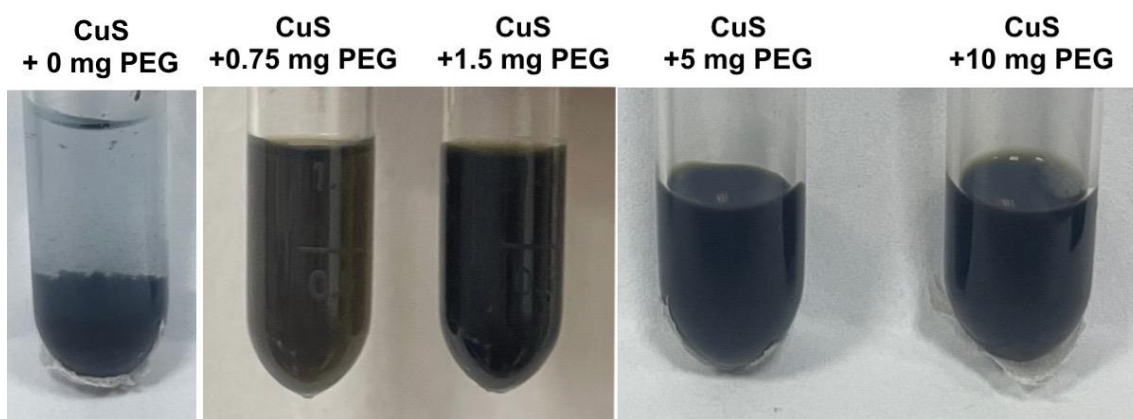

**Figure S1.** Images of CuS NPs without and with PEG modification.

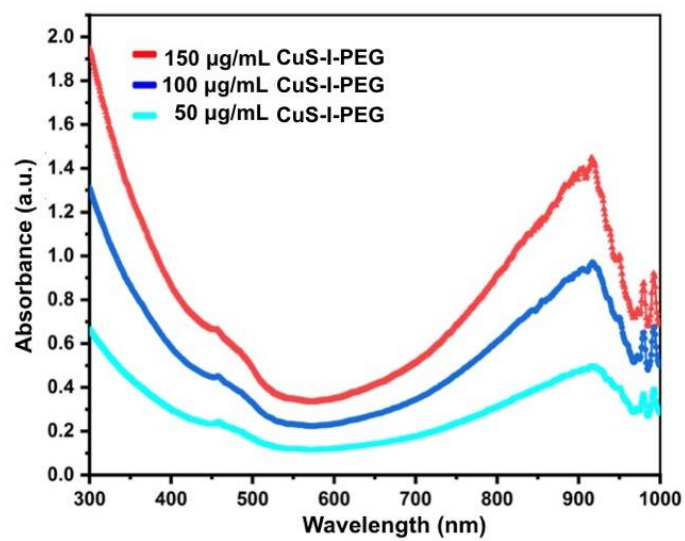

**Figure S2.** UV-Vis-NIR absorption spectra of CuS-I-PEG nanotheranostics with different concentration of CuS, i. e. 150 µg/mL, 100 µg/mL and 50 µg/mL, respectively.

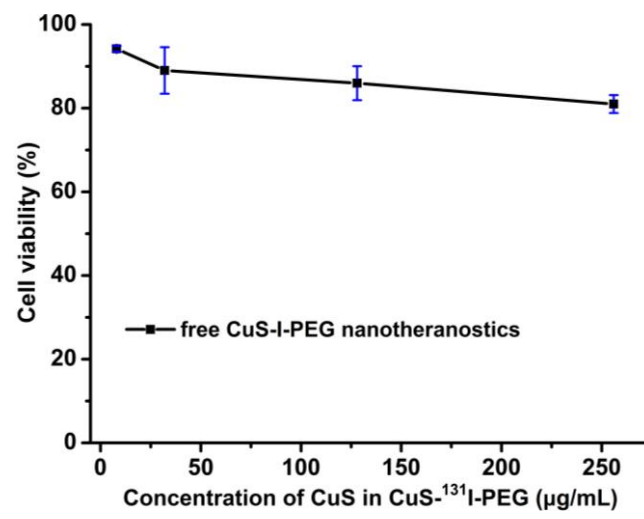

**Figure S3.** Cytotoxicity of free CuS-I-PEG nanotheranostics after incubation with A549 cells for 24 h.

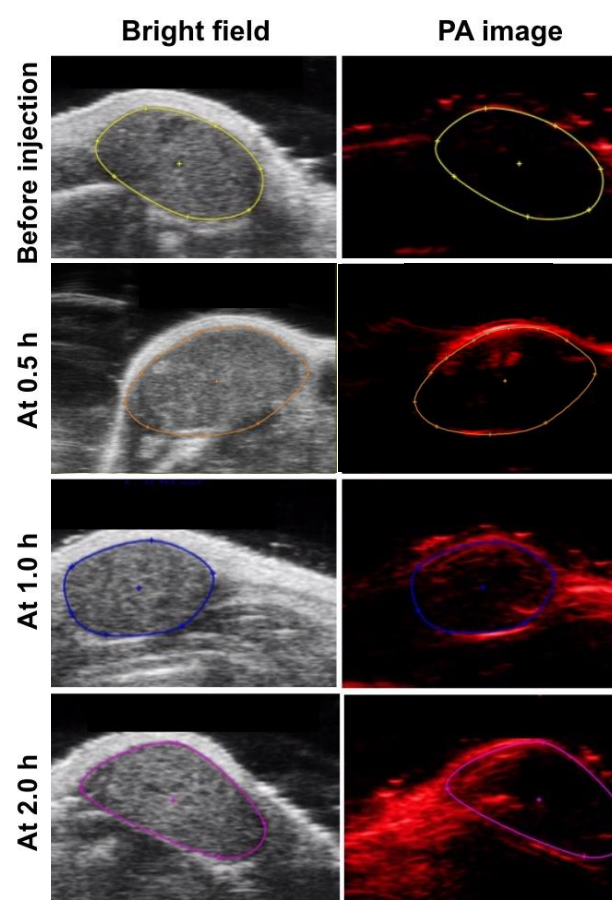

**Figure S4.** Photoacoustic images of CuS-<sup>131</sup>I-PEG nanotheranostics at tumors without 808 nm NIR laser irradiation.

**Table S1.** Formulations with different amount of CuS, iodine and PEG, and their size and zeta potential results.

| Formulations | CuS(mg) | NaI(mg) | CuS:NaI(<br>mol ratio) | SH-<br>PEG <sub>5K</sub> (mg) | Size(Number<br>mean d.nm) | Zeta<br>potential |
|--------------|---------|---------|------------------------|-------------------------------|---------------------------|-------------------|
| 1            | 3.3625  | /       | /                      | 0                             | 10                        | -13               |
| 2            | 3.3625  | /       | /                      | 0.5                           | 10                        | -20               |
| 3            | 3.3625  | /       | /                      | 0.75                          | 15                        | -20               |
| 4            | 3.3625  | /       | /                      | 1.5                           | 17                        | -21               |
| 5            | 3.3625  | /       | /                      | 2.5                           | 18                        | -21               |
| 6            | 3.3625  | /       | /                      | 5                             | 16                        | -37               |
| 7            | 3.3625  | /       | /                      | 10                            | 20                        | -32               |
| 8            | 3.3625  | 0       | 0                      | 1.5                           | 15                        | -14               |
| 9            | 3.3625  | 0.1875  | 20:1                   | 1.5                           | 18                        | -20               |
| 10           | 3.3625  | 0.25    | 15:1                   | 1.5                           | 19                        | -14               |
| 11           | 3.3625  | 0.375   | 10:1                   | 1.5                           | 18                        | -14               |
| 12           | 3.3625  | 0.75    | 5:1                    | 1.5                           | 15                        | -13               |
| 13           | 3.3625  | 0.375   | 10:1                   | 0.5                           | 16                        | -15               |
| 14           | 3.3625  | 0.375   | 10:1                   | 0.75                          | 22                        | -20               |
| 15           | 3.3625  | 0.375   | 10:1                   | 1.5                           | 19                        | -16               |
| 16           | 3.3625  | 0.375   | 10:1                   | 2.5                           | 20                        | -19               |
